# Supplementary material for: Differences in Sex and the Incidence and In-Hospital Mortality among People Admitted for Infective Endocarditis in Spain, 2016–2020
Source: MDPI journal article supplement (doi:10.3390/jcm11226847), 2022-11-20
Supplement: s1 [file s1]

Table S1. Diagnosis, procedures and pathogens analyzed with their corresponding ICD10 codes.

| Diagnosis/Procedures/Pathogens                             | ICD-10 codes                                                                                                                                                                                                                                                                                                                                                                                                                                                                                                                                                                                                                                                                                                                                                                                                                                                                                                  |
|------------------------------------------------------------|---------------------------------------------------------------------------------------------------------------------------------------------------------------------------------------------------------------------------------------------------------------------------------------------------------------------------------------------------------------------------------------------------------------------------------------------------------------------------------------------------------------------------------------------------------------------------------------------------------------------------------------------------------------------------------------------------------------------------------------------------------------------------------------------------------------------------------------------------------------------------------------------------------------|
| Previous mitral valve disease                              | I050; I051; I052; I058; I059; I080; I081; I083; I340; I341; I342; I348; I349                                                                                                                                                                                                                                                                                                                                                                                                                                                                                                                                                                                                                                                                                                                                                                                                                                  |
| Previous aortic valve disease                              | I060; I061; I062; I068; I069; I080; I350; I351; I352; I358; I359; I082; I083                                                                                                                                                                                                                                                                                                                                                                                                                                                                                                                                                                                                                                                                                                                                                                                                                                  |
| Previous tricuspid valve disease                           | I070; I071; I072; I078; I079; I081; I082; I083; I360; I361; I362; I368; I369                                                                                                                                                                                                                                                                                                                                                                                                                                                                                                                                                                                                                                                                                                                                                                                                                                  |
| Previous pulmonary valve disease                           | I370; I371; I372; I378; I379                                                                                                                                                                                                                                                                                                                                                                                                                                                                                                                                                                                                                                                                                                                                                                                                                                                                                  |
| Congenital malformation of heart                           | Q20.x; Q21.x; Q22.x; Q23.x; Q24.x                                                                                                                                                                                                                                                                                                                                                                                                                                                                                                                                                                                                                                                                                                                                                                                                                                                                             |
| Drug abuse                                                 | F1110; F1111; F11120; F11121; F11122; F11129; F1114; F11150; F11151; F11159; F11181; F11182; F11188; F1119; F1120; F1121; F11220; F11221; F11222; F11229; F1123; F1124; F11250; F11251; F11259; F11281; F11282; F11288; F1129; F1210; F1211; F12120; F12121; F12122; F12129; F12150; F12151; F12159; F12180; F12188; F1219; F1220; F1221; F12220; F12221; F12222; F12229; F1223; F12250; F12251; F12259; F12280; F12288; F1229; F1310; F1311; F13120; F13121; F13129; F1314; F13150; F13151; F13159; F13180; F13181; F13182; F13188; F1319; F1320; F1321; F13220; F13221; F13229; F13230; F13231; F13232; F13239; F1324; F13250; F13251; F13259; F1326; F1327; F13280; F13281; F13282; F13288; F1329; F1410; F1411; F14120; F14121                                                                                                                                                                            |
| COVID-19                                                   | B34.2; B97.29; U07.1                                                                                                                                                                                                                                                                                                                                                                                                                                                                                                                                                                                                                                                                                                                                                                                                                                                                                          |
| Atrial fibrillation                                        | I48.0; I48.1; I48.2; I48.91                                                                                                                                                                                                                                                                                                                                                                                                                                                                                                                                                                                                                                                                                                                                                                                                                                                                                   |
| Ischemic heart disease                                     | I20-I25                                                                                                                                                                                                                                                                                                                                                                                                                                                                                                                                                                                                                                                                                                                                                                                                                                                                                                       |
| Periannular complications/atrioventricular block           | I51.1; I51.2; I44.2; I44.1                                                                                                                                                                                                                                                                                                                                                                                                                                                                                                                                                                                                                                                                                                                                                                                                                                                                                    |
| Septic arterial embolism                                   | I76                                                                                                                                                                                                                                                                                                                                                                                                                                                                                                                                                                                                                                                                                                                                                                                                                                                                                                           |
| Shock                                                      | R57.0                                                                                                                                                                                                                                                                                                                                                                                                                                                                                                                                                                                                                                                                                                                                                                                                                                                                                                         |
| Prosthetic valve carriers                                  | Z95.2                                                                                                                                                                                                                                                                                                                                                                                                                                                                                                                                                                                                                                                                                                                                                                                                                                                                                                         |
| Dialysis                                                   | 5A1D xxx                                                                                                                                                                                                                                                                                                                                                                                                                                                                                                                                                                                                                                                                                                                                                                                                                                                                                                      |
| Heart valve surgery (aortic, mitral, tricuspid, pulmonary) | 024F07J; 024F08J; 024F0JJ; 024F0KJ; 02BF0ZX; 02BF0ZZ; 02CF0ZZ; 02NF0ZZ; 02QF0ZJ; 02QF0ZZ; 02RF07Z; 02RF08Z; 02RF0JZ; 02RF0KZ; 02UF07J; 02UF07Z; 02UF08J; 02UF08Z; 02UF0JJ; 02UF0JZ; 02UF0KJ; 02UF0KZ; 02WF07Z; 02WF08Z; 02WF0JZ; 02WF0KZ; X2RF032 024G072; 024G082; 024G0J2; 024G0K2; 02BG0ZX; 02BG0ZZ; 02CG0ZZ; 02NG0ZZ; 02QG0ZE; 02QG0ZZ; 02RG07Z; 02RG08Z; 02RG0JZ; 02RG0KZ; 02UG07E; 02UG07Z; 02UG08E; 02UG08Z; 02UG0JE; 02UG0JZ; 02UG0KE; 02UG0KZ; 02VG0ZZ; 02WG07Z; 02WG08Z; 02WG0JZ; 02WG0KZ 024J072; 024J082; 024J0J2; 024J0K2; 02BJ0ZX; 02BJ0ZZ; 02CJ0ZZ; 02NJ0ZZ; 02QJ0ZG; 02QJ0ZZ; 02RJ07Z; 02RJ08Z; 02RJ0JZ; 02RJ0KZ; 02UJ07G; 02UJ07Z; 02UJ08G; 02UJ08Z; 02UJ0JG; 02UJ0JZ; 02UJ0KG; 02UJ0KZ; 02WJ07Z; 02WJ08Z; 02WJ0JZ; 02WJ0KZ 02BH0ZX; 02BH0ZZ; 02CH0ZZ; 02NH0ZZ; 02QH0ZZ; 02RH07Z; 02RH08Z; 02RH0JZ; 02RH0KZ; 02TH0ZZ; 02UH07Z; 02UH08Z; 02UH0JZ; 02UH0KZ; 02WH07Z; 02WH08Z; 02WH0JZ; 02WH0KZ |
| Mechanical ventilation                                     | 5A09357; 5A09457; 5A09557; 5A1945Z; 5A1955Z; 5A1935Z                                                                                                                                                                                                                                                                                                                                                                                                                                                                                                                                                                                                                                                                                                                                                                                                                                                          |
| Pacemaker implantation                                     | 02HKxxx; 02HLxxx; 02H4xxx; 02H6xxx; 02H7xxx; 02HNxxx; 0JH6xxx; 0JH8xxx                                                                                                                                                                                                                                                                                                                                                                                                                                                                                                                                                                                                                                                                                                                                                                                                                                        |
| Staphylococcus bacteremia                                  | A4101; A4102; A411; A412; A4901; A4902; B9561; B9562; B957; B958                                                                                                                                                                                                                                                                                                                                                                                                                                                                                                                                                                                                                                                                                                                                                                                                                                              |
| Streptococcus bacteremia                                   | A400; A401; A403; A408; A409; A491; B950; B951; B953; B954; B955                                                                                                                                                                                                                                                                                                                                                                                                                                                                                                                                                                                                                                                                                                                                                                                                                                              |
| Gram-negative bacilli bacteremia                           | A413; A4150; A4151; A4152; A4153; A4159; B961; B9620; B9621; B9622; B9623; B9629; B963; B964; B965                                                                                                                                                                                                                                                                                                                                                                                                                                                                                                                                                                                                                                                                                                                                                                                                            |
| Fungemia                                                   | B376; B377; B409; B393; B394; B395; B399; B449                                                                                                                                                                                                                                                                                                                                                                                                                                                                                                                                                                                                                                                                                                                                                                                                                                                                |

The ICD 10 codes for conditions included in the Charlson Comorbidity Index can be found in references: Sundararajan V, Henderson T, Perry C, Muggivan A, Quan H, Ghali WA. New ICD-10 version of the Charlson comorbidity index predicted in-hospital mortality. J Clin Epidemiol. 2004; 57:1288–94. doi: 10.1016/j.jclinepi.2004.03.012. Quan H, Sundararajan V, Halfon P, Fong

A, Burnand B, Luthi JC, et al. Coding algorithms for defining comorbidities in ICD-9-CM and ICD-10 administrative data. Med Care. 2005; 43:1130-9. doi: 10.1097/01.mlr.0000182534.19832.83.

Table S2. Hospital departments where patients with infective endocarditis were admitted according to sex. Hospital Discharge Records of the Spanish National Health System (RAE-CMBD) from 2016 to 20.

| Hospital department    | Women |       | Men  |       | p-value |
|------------------------|-------|-------|------|-------|---------|
|                        | N     | %     | N    | %     |         |
| Internal Medicine      | 1507  | 43.32 | 2718 | 38.94 | <0.001  |
| Cardiology             | 564   | 16.21 | 1255 | 17.98 | 0.025   |
| Cardiovascular Surgery | 344   | 9.89  | 988  | 14.15 | <0.001  |
| Infectious diseases    | 273   | 7.85  | 721  | 10.33 | <0.001  |
| Intensive Care Unit    | 253   | 7.27  | 503  | 7.21  | 0.902   |

P value for the comparison between women and men using Chi square test.
